# Supplementary material
Source: publisher figshare collection journal article supplement (https://future-science-group.figshare.com/ndownloader/files/31112680)
Supplement: Supplementary file 1 [file 31112680]

**Supplementary figures**

***Fig. S1. The relative mRNA expression of several genes related to tumor progression was detected via the knockdown of AC245100.4.***

***
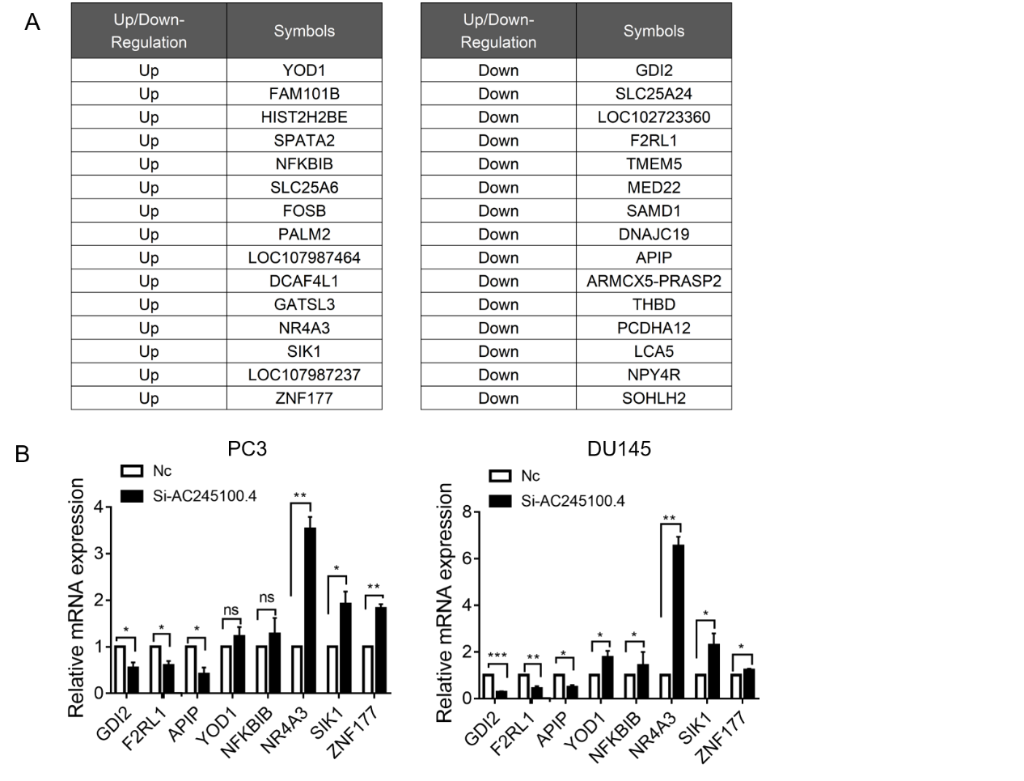
***

Fig. S1. (A) The up/down regulation genes were sequenced according to the rank of differentially expressed in the RNA-seq analysis. (B) The relative mRNA expression was detected by qRT-PCR in PC3 and DU145 cells with AC245100.4 knocked down. *vs.* Nc. * P＜0.05, ** P＜0.01, *** P＜0.001.

***Fig. S2. Overexpression efficiency was detected in PC3 and DU145 cell lines.***


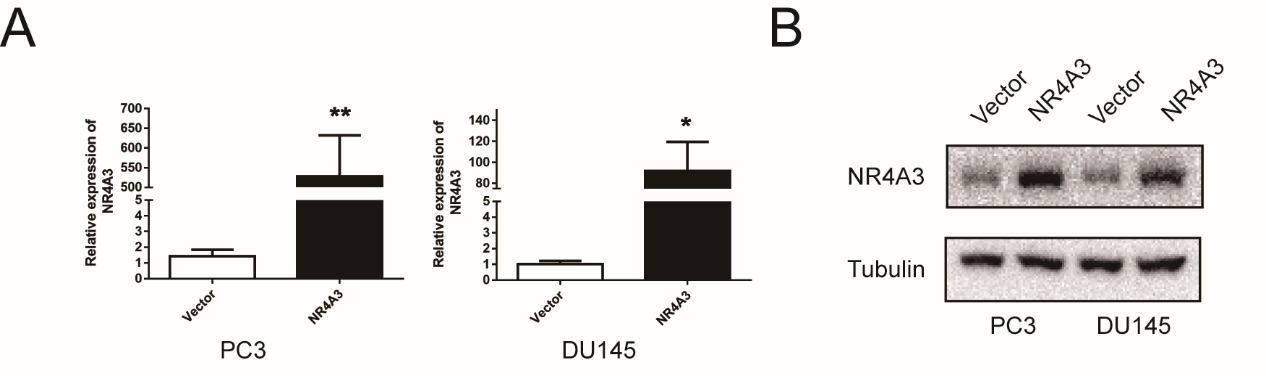


Fig. S2. (A&B) Overexpression efficiency was detected by qRT-PCR and western blot in PC3 and DU145 cell lines.* *P*<0.05, ** *P*<0.01*.*

***Fig. S3. The effect of NR4A3 on the proliferation of prostate cancer cells.***


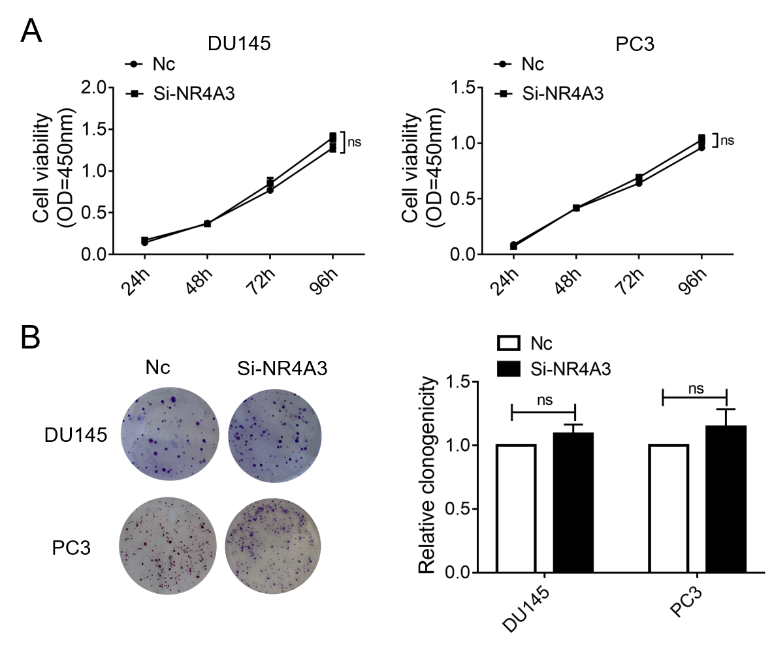


Fig. S3. The effect of NR4A3 on the proliferation of prostate cancer cells. (A&B) The proliferation of PC3 and DU145 cells was determined by CCK-8 and colony formation assays following overexpression of NR4A3. vs. Nc. ns, not significant.
